# Supplementary figures and images for: High intermediate precision Sm isotope measurements in geological samples by MC-ICP-MS
Source: Royal Society of Chemistry journal article supplement (doi:10.1039/d2ja00412g), 2023-01-01

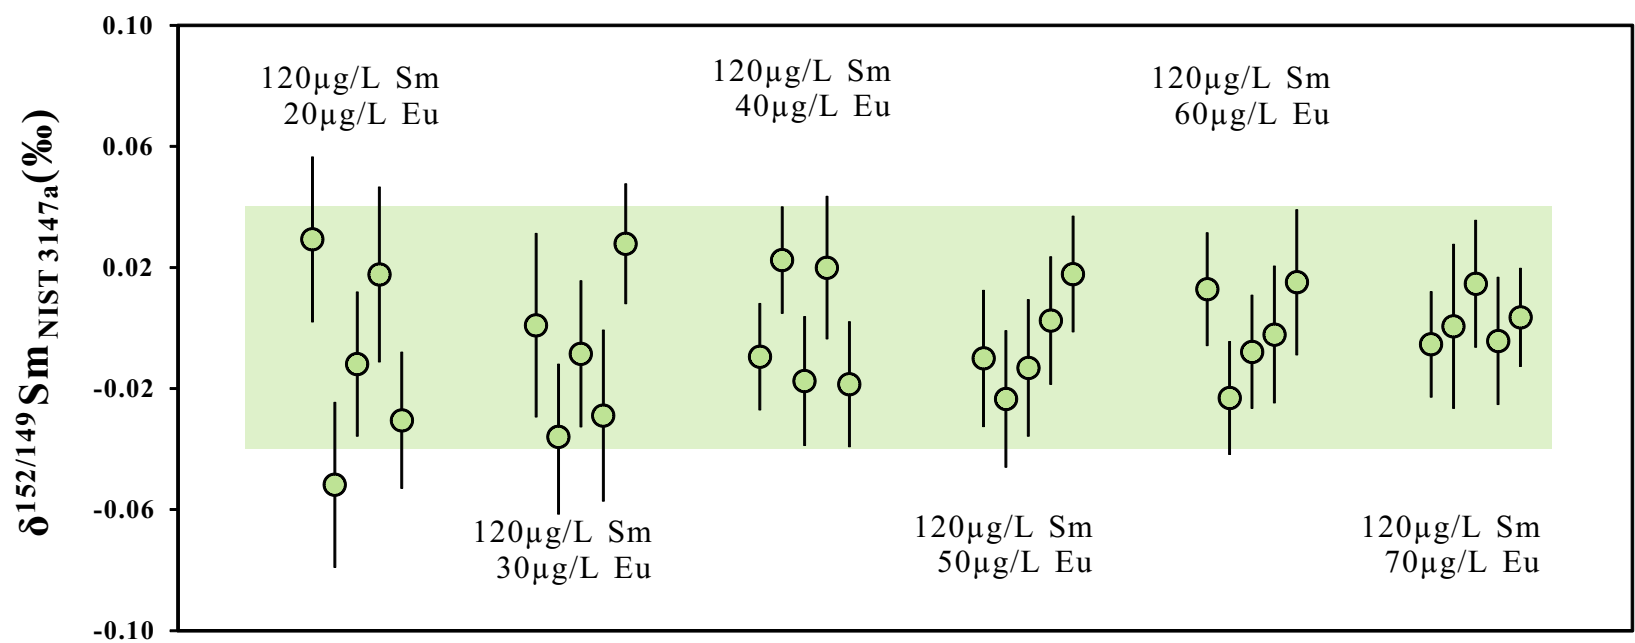

Supplement: d2ja00412g1.pdf [file d2ja00412g1.pdf]
